# Supplementary material for: Effect of additional body weight on arch index and dynamic plantar pressure distribution during walking and gait termination
Source: PeerJ. 2020 Apr 21;8:e8998. doi: 10.7717/peerj.8998 (PMC7182029; doi:10.7717/peerj.8998)
Supplement: Data S2 [file peerj-08-8998-s002.xlsx]

## Sheet: Sheet1
Number	WALK				PGT				UGT
	0%BW	10%BW	20%BW	30%BW	0%BW	10%BW	20%BW	30%BW	0%BW	10%BW	20%BW	30%BW
1	19.9	21.85	22.25	22.25	19.6	21.22	22.08	22.22	21.88	22.56	22.7	22.88
2	23.2	24.35	24.95	25.75	23.24	23.6	24.65	24.22	24	24.22	24.36	24.82
3	25.2	25.4	26	25.55	26.36	26.44	26	27.02	25.88	26.08	26.5	26.46
4	19.4	21.15	21.25	22.1	20.74	20.92	21.8	21.52	19.16	20.44	20.82	22.24
5	25.9	28.15	29.05	28.35	27.84	29.74	29.96	29.72	26.84	29.36	29.12	30.12
6	24.25	25.45	26.25	26.815	26.42	26.74	26.18	26.24	26.54	26.3	26.48	26.4
7	25.75	26.35	26.95	28.7	26.06	27.1	27.2	28.02	25.72	26.18	27.76	27.84
8	24.8	25.5	26.25	26.65	25.34	26.288	26.32	26.92	24.22	24.72	25.58	25.64
9	22.3	23.6	24.5	25.05	23.06	24.08	25.74	26.44	23.44	24.48	26.08	27.12
10	23	23.2	23.8	24.2	24.02	23.76	24.18	24.16	23.06	23.32	24	24.46
11	25.8	25.65	26.05	26.15	25.4	25.96	26.26	26.42	25.82	26.28	26.56	26.34
12	24.5	26	26.35	26.4	25.82	26.04	26.66	26.6	26.72	26.74	26.94	26.98
Mean	23.7	24.72	25.3	25.66	24.5	25.16	25.59	25.79	24.44	25.06	25.58	25.94
