# Supplementary material for: Effect of additional body weight on arch index and dynamic plantar pressure distribution during walking and gait termination
Source: PeerJ. 2020 Apr 21;8:e8998. doi: 10.7717/peerj.8998 (PMC7182029; doi:10.7717/peerj.8998)
Supplement: Data S3 [file peerj-08-8998-s003.xlsx]

## Sheet: General
WALK		M1	M2	M3	M4	M5	MF	HM	HL
	0%BW	0.0748519	0.182821	0.258149	0.167068	0.0863274	0.0518902	0.164577	0.156676
	10%BW	0.0809872	0.206937	0.282839	0.173217	0.0889053	0.0526352	0.173116	0.168169
	20%BW	0.0851358	0.208182	0.292776	0.180458	0.101999	0.0529303	0.191746	0.179449
	30%BW	0.104273	0.216464	0.299281	0.194138	0.108453	0.0583525	0.201178	0.200574
PGT		M1	M2	M3	M4	M5	MF	HM	HL
	0%BW	0.0408152	0.0753429	0.0994115	0.0859083	0.0503806	0.0550961	0.12235	0.121266
	10%BW	0.0443145	0.0791469	0.103867	0.0874016	0.0519342	0.0563559	0.131387	0.128475
	20%BW	0.0452373	0.0795182	0.105761	0.0914711	0.0554236	0.061282	0.145773	0.131191
	30%BW	0.0495307	0.0861057	0.117186	0.0971868	0.059572	0.0623334	0.151944	0.139989
UGT		M1	M2	M3	M4	M5	MF	HM	HL
	0%BW	0.0575894	0.100906	0.135367	0.110353	0.0623	0.0517234	0.184849	0.186636
	10%BW	0.0583074	0.102416	0.138925	0.116718	0.0682101	0.0563218	0.186903	0.192261
	20%BW	0.0614891	0.107042	0.145755	0.120019	0.0731716	0.0589531	0.194004	0.195434
	30%BW	0.069409	0.114194	0.151483	0.125759	0.0789843	0.0675317	0.201673	0.202518

## Sheet: WALK
Number	0%BW								10%BW								20%BW								30%BW
	M1	M2	M3	M4	M5	MF	HM	HL	M1	M2	M3	M4	M5	MF	HM	HL	M1	M2	M3	M4	M5	MF	HM	HL	M1	M2	M3	M4	M5	MF	HM	HL
1	0.0933333	0.219333	0.226	0.167667	0.083	0.04	0.2	0.152667	0.0936667	0.202667	0.259333	0.154667	0.0646667	0.044	0.193333	0.194667	0.106	0.221333	0.258667	0.120667	0.0586667	0.0566667	0.180667	0.174	0.174	0.238	0.272	0.148	0.0566667	0.0546667	0.192667	0.224667
2	0.160606	0.239394	0.30303	0.152273	0.0937879	0.0839394	0.226515	0.198485	0.0806061	0.286894	0.35303	0.205303	0.109091	0.0818182	0.241667	0.243182	0.108455	0.251515	0.293939	0.137121	0.0666667	0.0643939	0.205303	0.197727	0.197727	0.270455	0.309091	0.168182	0.0643939	0.0621212	0.218939	0.255303
3	0.0238462	0.180769	0.204615	0.120769	0.0853846	0.0415385	0.110769	0.1	0.0730769	0.207692	0.187692	0.08	0.0730769	0.0369231	0.163846	0.07	0.0661538	0.176154	0.226154	0.2	0.136154	0.0515385	0.133846	0.116154	0.0338462	0.182308	0.254615	0.179231	0.111538	0.0530769	0.136077	0.122308
4	0.0793651	0.156349	0.246032	0.169841	0.0793651	0.0420635	0.159524	0.157143	0.0865079	0.215873	0.288889	0.17381	0.124603	0.0412698	0.161905	0.211111	0.0912698	0.233016	0.265873	0.151587	0.113016	0.0396825	0.207937	0.187302	0.138889	0.263492	0.307143	0.162698	0.11746	0.0404762	0.203968	0.221429
5	0.0323529	0.107353	0.233235	0.167353	0.105147	0.0441176	0.172794	0.160294	0.0736765	0.130882	0.168382	0.129412	0.1085	0.0507353	0.158088	0.150735	0.0675	0.169412	0.225735	0.127941	0.1	0.0367647	0.183088	0.172794	0.0764706	0.148529	0.183088	0.105882	0.0632353	0.0411765	0.189706	0.173529
6	0.120667	0.191333	0.211333	0.109333	0.0573333	0.0673333	0.134	0.152667	0.111667	0.201333	0.246	0.126667	0.05	0.0626667	0.126667	0.156667	0.0893333	0.245333	0.314667	0.193333	0.118667	0.0613333	0.216667	0.205333	0.0706667	0.214667	0.265333	0.188667	0.151333	0.093	0.188	0.172667
7	0.120667	0.191333	0.211333	0.109333	0.0573333	0.0673333	0.134	0.152667	0.116667	0.201333	0.246	0.126667	0.05	0.0626667	0.126667	0.156667	0.0943333	0.245333	0.314667	0.193333	0.118667	0.0613333	0.216667	0.205333	0.0706667	0.214667	0.265333	0.188667	0.151333	0.093	0.188	0.172667
8	0.0732394	0.13662	0.212676	0.23662	0.100986	0.043662	0.161972	0.123239	0.0776056	0.146479	0.194366	0.191549	0.109958	0.0507042	0.135915	0.125352	0.0915493	0.132394	0.183099	0.185211	0.124648	0.0422535	0.185211	0.142254	0.111268	0.147183	0.214789	0.221831	0.147183	0.0422535	0.201408	0.139437
9	0.0132353	0.205882	0.368382	0.205735	0.118676	0.0183824	0.216176	0.217941	0.0495588	0.255882	0.320588	0.230147	0.117647	0.0272059	0.230147	0.213235	0.0667647	0.258088	0.395588	0.233088	0.113235	0.0264706	0.251471	0.244853	0.0536765	0.280147	0.347794	0.236029	0.139706	0.0294118	0.242647	0.233824
10	0.0690476	0.150794	0.319841	0.153175	0.0992063	0.0531746	0.184921	0.17619	0.0976984	0.207937	0.357143	0.160317	0.0984127	0.0531746	0.216667	0.214286	0.0642857	0.207937	0.407143	0.219841	0.149286	0.0730159	0.214286	0.219841	0.136508	0.2	0.407143	0.225397	0.124603	0.0642857	0.268444	0.292857
11	0.0546053	0.242105	0.269211	0.218684	0.0782895	0.0671053	0.128289	0.138816	0.0493421	0.215789	0.403289	0.253289	0.0802632	0.0736842	0.153947	0.143421	0.0992105	0.171053	0.301974	0.224342	0.0822368	0.0717105	0.167105	0.161184	0.115789	0.227632	0.394079	0.238132	0.0973684	0.0743421	0.2125	0.215132
12	0.0572581	0.172581	0.292097	0.194032	0.0774194	0.0540323	0.145968	0.15	0.0617742	0.210484	0.369355	0.246774	0.0806452	0.0467742	0.168548	0.13871	0.0767742	0.186613	0.325806	0.179032	0.0427419	0.05	0.13871	0.126613	0.0717742	0.210484	0.370968	0.266935	0.0766129	0.0524194	0.171774	0.183065
Mean	0.0748519	0.182821	0.258149	0.167068	0.0863274	0.0518902	0.164577	0.156676	0.0809872	0.206937	0.282839	0.173217	0.0889053	0.0526352	0.173116	0.168169	0.0851358	0.208182	0.292776	0.180458	0.101999	0.0529303	0.191746	0.179449	0.104273	0.216464	0.299281	0.194138	0.108453	0.0583525	0.201178	0.200574

## Sheet: PGT
Number	0%BW								10%BW								20%BW								30%BW
	M1	M2	M3	M4	M5	MF	HM	HL	M1	M2	M3	M4	M5	MF	HM	HL	M1	M2	M3	M4	M5	MF	HM	HL	M1	M2	M3	M4	M5	MF	HM	HL
1	0.0544	0.0752	0.0928	0.0770667	0.0344	0.0586667	0.126133	0.117333	0.0421333	0.0813333	0.105867	0.0637333	0.0362667	0.05	0.122133	0.1016	0.0554667	0.0917333	0.117067	0.0746667	0.0372	0.056	0.127733	0.131733	0.0448	0.0892	0.114667	0.0650667	0.0332	0.0676	0.1592	0.1512
2	0.027697	0.0657576	0.0684848	0.0729091	0.0399394	0.0706061	0.144242	0.12303	0.0284848	0.0942424	0.112485	0.0887879	0.0493939	0.0807879	0.167515	0.162727	0.0409091	0.102424	0.14303	0.112424	0.0702424	0.0819394	0.155636	0.146545	0.0578788	0.0960606	0.134242	0.0936364	0.0551515	0.072303	0.173818	0.214242
3	0.028	0.0815385	0.0910769	0.0724615	0.0341538	0.0393846	0.0798462	0.0643077	0.0307692	0.068	0.0646154	0.0678462	0.0270769	0.0436923	0.0736923	0.0726154	0.0403077	0.0818462	0.0830769	0.0670769	0.0355385	0.0443077	0.147077	0.122154	0.0430769	0.08	0.0949231	0.0627692	0.0343077	0.0467692	0.114	0.0732308
4	0.0688889	0.102222	0.0977778	0.0765079	0.0555556	0.0679365	0.136825	0.14381	0.0612698	0.103429	0.121587	0.0926984	0.0628571	0.0463175	0.142571	0.159365	0.0653968	0.0987302	0.0942857	0.071746	0.0488889	0.0647619	0.139175	0.148254	0.044127	0.0863492	0.129524	0.105079	0.0793651	0.0580317	0.156825	0.165714
5	0.0163125	0.04125	0.0678125	0.0648125	0.04125	0.0365625	0.060625	0.0584375	0.0265625	0.058125	0.071875	0.0641875	0.029375	0.0380625	0.08175	0.0578125	0.0109375	0.036875	0.0804375	0.050625	0.03325	0.045	0.156688	0.129562	0.03375	0.06725	0.092125	0.070625	0.0460625	0.04125	0.131937	0.0825
6	0.0527059	0.0791176	0.0991176	0.0685294	0.0470588	0.0397059	0.156176	0.150588	0.0576471	0.085	0.108824	0.0785294	0.0511765	0.0458824	0.142941	0.135882	0.075	0.0914706	0.108529	0.0802941	0.0497059	0.045	0.153588	0.118235	0.0720588	0.106529	0.126059	0.101176	0.06	0.0529412	0.13	0.133235
7	0.0448	0.0885333	0.103733	0.0837333	0.0464	0.0853333	0.1256	0.164	0.0621333	0.0986667	0.123733	0.0853333	0.0501333	0.068	0.129867	0.1448	0.0301333	0.0664	0.0962667	0.0786667	0.0469333	0.0810667	0.148133	0.119467	0.0538667	0.0952	0.132133	0.1016	0.0597333	0.0805333	0.134667	0.122133
8	0.0533521	0.0630986	0.0723944	0.0952113	0.0707042	0.0594366	0.0890141	0.064507	0.0542254	0.0594366	0.0701408	0.0983099	0.0667606	0.0470423	0.127042	0.0785915	0.0335211	0.0498592	0.0729577	0.113803	0.0802817	0.0571831	0.139944	0.102254	0.0450704	0.0676056	0.0930423	0.115775	0.076338	0.064507	0.156338	0.0912676
9	0.0270588	0.0832353	0.136471	0.113353	0.0761176	0.0370588	0.146176	0.187647	0.0335294	0.0794118	0.118235	0.112647	0.0805882	0.0593529	0.180941	0.211765	0.0294118	0.0797059	0.121176	0.121471	0.0832353	0.0492941	0.154294	0.152	0.0430588	0.0876471	0.126765	0.120294	0.0761765	0.0586471	0.201765	0.224412
10	0.0428571	0.0546032	0.0993651	0.0926984	0.0609524	0.0546032	0.135873	0.154921	0.052	0.0622222	0.105714	0.0955556	0.0669841	0.0577778	0.136508	0.157778	0.0669841	0.072381	0.112381	0.0971429	0.068254	0.0726984	0.137111	0.134921	0.0520635	0.0768254	0.110349	0.0895238	0.0660317	0.0568254	0.140317	0.145079
11	0.035	0.0805263	0.138421	0.126842	0.0618421	0.0760526	0.140263	0.125	0.0346316	0.0633158	0.102684	0.102158	0.0642105	0.07	0.136842	0.132632	0.0402632	0.0676316	0.106316	0.119737	0.0702632	0.0768421	0.147579	0.143684	0.0352632	0.0770526	0.118526	0.122632	0.0823684	0.0879474	0.170263	0.133947
12	0.0387097	0.0890323	0.125484	0.0867742	0.0361935	0.0358065	0.127419	0.101613	0.0483871	0.0965806	0.140645	0.0990323	0.0383871	0.0693548	0.134839	0.126129	0.0545161	0.115161	0.133613	0.11	0.0412903	0.0612903	0.142323	0.125484	0.0693548	0.103548	0.133871	0.118065	0.046129	0.0606452	0.154194	0.142903
Mean	0.0408152	0.0753429	0.0994115	0.0859083	0.0503806	0.0550961	0.12235	0.121266	0.0443145	0.0791469	0.103867	0.0874016	0.0519342	0.0563559	0.131387	0.128475	0.0452373	0.0795182	0.105761	0.0914711	0.0554236	0.061282	0.145773	0.131191	0.0495307	0.0861057	0.117186	0.0971868	0.059572	0.0623334	0.151944	0.139989

## Sheet: UGT
Number	0%BW								10%BW								20%BW								30%BW
	M1	M2	M3	M4	M5	MF	HM	HL	M1	M2	M3	M4	M5	MF	HM	HL	M1	M2	M3	M4	M5	MF	HM	HL	M1	M2	M3	M4	M5	MF	HM	HL
1	0.0618667	0.0925333	0.126267	0.0913333	0.0437333	0.0597333	0.2096	0.209067	0.0752	0.126133	0.162133	0.0948	0.0477333	0.0698667	0.1872	0.170133	0.0762667	0.129733	0.1496	0.0968	0.0581333	0.0677333	0.210933	0.194933	0.0770667	0.108533	0.123467	0.0842667	0.0389333	0.0864	0.220533	0.217067
2	0.0754545	0.144242	0.144242	0.132727	0.0515152	0.0731515	0.282121	0.297273	0.0709091	0.133333	0.161515	0.129697	0.0590909	0.0564848	0.178182	0.333636	0.102121	0.134545	0.174545	0.140909	0.0684848	0.0857576	0.246667	0.292727	0.127152	0.182727	0.214848	0.140606	0.0687879	0.0918182	0.229576	0.286061
3	0.0404615	0.0796923	0.138462	0.0923077	0.0341538	0.0372308	0.132769	0.113538	0.048	0.0996923	0.105846	0.0798462	0.0424615	0.0372308	0.146769	0.0926154	0.0427692	0.0881538	0.122462	0.0624615	0.0629231	0.0367692	0.134462	0.148769	0.0443077	0.112615	0.128615	0.0809231	0.0489231	0.0436923	0.138769	0.157692
4	0.0552381	0.104127	0.124127	0.0942857	0.0720635	0.0447619	0.224762	0.238413	0.0711111	0.120952	0.151111	0.11873	0.0791746	0.048254	0.219048	0.243175	0.0754921	0.120317	0.154222	0.125079	0.0736508	0.0439048	0.205397	0.210794	0.0812698	0.130159	0.172698	0.123175	0.0898413	0.0530159	0.220635	0.210476
5	0.058125	0.0715625	0.13875	0.085875	0.0515625	0.051875	0.123125	0.121875	0.0291875	0.0666875	0.11675	0.0934375	0.0775	0.064375	0.150313	0.119375	0.0215625	0.07875	0.13	0.122188	0.0984375	0.06	0.13975	0.132	0.0159375	0.0659375	0.103125	0.12125	0.11875	0.0728125	0.12875	0.1325
6	0.045	0.0770588	0.0947059	0.094	0.0691176	0.0478824	0.172941	0.187941	0.0697059	0.0888235	0.114176	0.0894706	0.0686471	0.0461765	0.176176	0.223824	0.0758824	0.113	0.132647	0.0826471	0.0588235	0.0479412	0.158471	0.208235	0.0947059	0.137647	0.165588	0.110588	0.0761765	0.0520588	0.194118	0.196176
7	0.0738667	0.1264	0.1296	0.0874667	0.044	0.0530667	0.168	0.230933	0.052	0.0912	0.118933	0.101867	0.0565333	0.0718667	0.189067	0.178667	0.0504	0.1104	0.1488	0.1048	0.0586667	0.0794667	0.214667	0.183467	0.0674667	0.1128	0.142933	0.111733	0.0669333	0.0832	0.179733	0.170133
8	0.0625352	0.0625352	0.109718	0.102254	0.0698592	0.046	0.134366	0.10169	0.0478873	0.0591549	0.0892958	0.135183	0.0777465	0.043662	0.158592	0.115211	0.0692958	0.0896338	0.134197	0.111831	0.0752113	0.0459155	0.167887	0.138986	0.0695775	0.0687324	0.0839437	0.106479	0.0797183	0.048169	0.165915	0.128423
9	0.0270588	0.0864706	0.127941	0.135882	0.105882	0.0328235	0.216176	0.208824	0.0258824	0.095	0.132647	0.153235	0.106294	0.0402941	0.242059	0.252353	0.0347059	0.107647	0.152647	0.142647	0.0994118	0.0477059	0.266471	0.251176	0.0361765	0.0964706	0.144412	0.141471	0.105882	0.0447059	0.258529	0.269706
10	0.0606032	0.0730159	0.120317	0.113333	0.0815873	0.0460317	0.136508	0.133333	0.0704762	0.0812698	0.16381	0.138	0.0755556	0.0530159	0.167302	0.16254	0.0609524	0.0920635	0.137302	0.0987302	0.0692063	0.0546032	0.187302	0.187619	0.0707937	0.067619	0.117143	0.10127	0.068254	0.0584127	0.222159	0.209841
11	0.0838947	0.161947	0.197368	0.163158	0.0731579	0.0697368	0.183947	0.191579	0.0986842	0.168684	0.208947	0.152158	0.0855263	0.0794737	0.196842	0.189474	0.0484211	0.0902632	0.159737	0.190526	0.0973684	0.0847368	0.168947	0.172632	0.0568421	0.102895	0.212632	0.213158	0.116579	0.0915789	0.206842	0.210526
12	0.0469677	0.13129	0.172903	0.131613	0.0509677	0.0583871	0.233871	0.205161	0.0406452	0.0980645	0.141935	0.114194	0.0422581	0.0651613	0.23129	0.226129	0.08	0.13	0.152903	0.161613	0.0577419	0.0529032	0.227097	0.223871	0.0916129	0.184194	0.208387	0.174194	0.0690323	0.0845161	0.254516	0.241613
Mean	0.0575894	0.100906	0.135367	0.110353	0.0623	0.0517234	0.184849	0.186636	0.0583074	0.102416	0.138925	0.116718	0.0682101	0.0563218	0.186903	0.192261	0.0614891	0.107042	0.145755	0.120019	0.0731716	0.0589531	0.194004	0.195434	0.069409	0.114194	0.151483	0.125759	0.0789843	0.0675317	0.201673	0.202518
